# Supplementary material for: Dose–response relationship between physical activity and mortality in people with non-communicable diseases: a study protocol for the systematic review and meta-analysis of cohort studies
Source: PubMed Central journal article supplement — BMJ Open. 2019 Sep 11;9(9):e028653. doi: 10.1136/bmjopen-2018-028653 (PMC6747656; doi:10.1136/bmjopen-2018-028653), 2019-09-11
Supplement: bmjopen-2018-028653supp002.pdf [file bmjopen-2018-028653supp002.pdf]

## Supplementary File 2: Literature search strategy

### Dose-response relationship of physical activity and mortality in people with noncommunicable diseases. Study protocol for a systematic review and meta-analysis of cohort studies

Search strategy according to PICO framework:

#### Population

##### Indication specific keywords

##### *Breast cancer*

- #1 “breast neoplasm” [MeSH Terms]
- #2 “breast tumor”
- #3 “breast carcinoma”
- #4 “human mammary neoplasm”
- #5 “breast cancer”
- #6 “mammary cancer”
- #7 “breast malignant neoplasm”
- #8 “breast malignant tumor”
- #9 #1 OR #2 OR #3 OR #4 OR #5 OR #6 OR #7 OR #8

##### *Type 2 diabetes mellitus*

- #10 “diabetes mellitus, type 2” [MeSH Terms]
- #11 “noninsulin dependent diabetes mellitus”
- #12 “ketosis resistant diabetes mellitus”
- #13 “stable diabetes mellitus”
- #14 “type 2 diabetes mellitus”
- #15 “NIDDM”
- #16 “maturity onset diabetes mellitus”
- #17 “slow onset diabetes mellitus”
- #18 #10 OR #11 OR #12 OR #13 OR #14 OR #15 OR #16 OR #17

##### *Chronic Obstructive Pulmonary Disease*

- #19 “COPD” [MeSH Terms]
- #20 “pulmonary disease, chronic obstructive” [MeSH Terms]
- #21 “COAD”
- #22 “chronic obstructive airway disease”
- #23 “chronic obstructive lung disease”
- #24 “chronic airflow obstruction”
- #25 #19 OR #20 OR #21 OR #22 OR #23 OR #24

##### *Ischemic heart disease*

- #26 “myocardial ischemia” [MeSH Terms]
- #27 “coronary artery disease” [MeSH Terms]
- #28 “myocardial infarction” [MeSH Terms]
- #29 “myocardial ischemia”
- #30 “coronary artery disease”

- #31 “myocardial infarction”  
#32 #26 OR #27 OR #28 OR #29 OR #30 OR #31

### ***Major depressive disorder***

- #33 “depression” [MeSH Terms]  
#34 “depressive disorder, major” [MeSH Terms]  
#35 “depressive disorder”  
#36 “depressive symptoms”  
#37 “emotional depression”  
#38 #33 OR #34 OR #35 OR #36 OR #37

### ***Low back pain***

- #39 “low back pain” [MeSH Terms]  
#40 “lumbago”  
#41 “low backache”  
#42 #39 OR #40 OR #41

### ***Stroke***

- #43 “stroke” [MeSH Terms]  
#44 “cerebrovascular accident”  
#45 “CVA”  
#46 “apoplexy”  
#47 “brain vascular accident”  
#48 #43 OR #44 OR #45 OR #46 OR #47

### ***Osteoarthritis***

- #49 “osteoarthritis” [MeSH Terms]  
#50 “osteoarthrosis”  
#51 “osteoarthritides”  
#52 “arthritis degenerative”  
#53 #49 OR #50 OR #51 OR #52

### ***Lung cancer***

- #54 “lung neoplasm” [MeSH Terms]  
#55 “pulmonary neoplasm”  
#56 “lung cancer”  
#57 “pulmonary cancer”  
#58 #54 OR #55 OR #56 OR #57

### **Intervention (Exposure)**

- #59 “human activities” [MeSH Terms]  
#60 “motor activities” [MeSH Terms]  
#61 “leisure activities” [MeSH Terms]  
#62 “exercises” [MeSH Terms]  
#63 “running” [MeSH Terms]  
#64 “walking” [MeSH Terms]  
#65 “bicycling” [MeSH Terms]

- #66 “gardening” [MeSH Terms]
- #67 “sports” [MeSH Terms]
- #68 “activities of daily living” [MeSH Terms]
- #69 “human activity”
- #70 “motor activity”
- #71 “leisure activity”
- #72 “exercise”
- #73 “sport”
- #74 “physical activity
- #74 “physical activities
- #75 “nonexercise activity”
- #76 “nonexercise activities”
- #77 “energy expenditure”
- #78 “caloric expenditure”
- #79 #59 OR #60 OR #61 OR #62 OR #63 OR #64 OR #65 OR #66 OR #67 OR #68 OR #69 OR #70 OR #71 OR #72 OR #73 OR #74 OR #75 OR #76 OR #77 OR #78

#### **Comparator**

None.

#### **Outcome**

- #79 “mortality” [MeSH Terms]
- #80 “death”
- #81 “survival”
- #82 “life expectancy”
- #83 “years of life lost”
- #84 #79 OR #80 OR #81 OR #82 OR #83

**Years covered by search:** All years, no time restriction.

**Language:** English

**Study design filter:** No restriction.

**PubMed search example for the Chronic Obstructive Coronary Disease:**

**1#** (("COPD" OR "pulmonary disease, chronic obstructive"[MeSH Terms])) OR ("COPD"[Title/Abstract] OR "chronic obstructive pulmonary disease"[Title/Abstract] OR "COAD"[Title/Abstract] OR "chronic obstructive airway disease"[Title/Abstract] OR "chronic obstructive lung disease"[Title/Abstract] OR "chronic airflow obstruction"[Title/Abstract])

**2#** (("human activities" OR "motor activities" OR "leisure activities" OR "exercises" OR "running" OR "walking" OR "bicycling" OR "gardening" OR "sports" OR "activities of daily living"[MeSH Terms]) OR ("human activities"[Title/Abstract] OR "human activity"[Title/Abstract] OR "motor activity"[Title/Abstract] OR "motor activities"[Title/Abstract] OR "leisure activities"[Title/Abstract] OR "leisure activity"[Title/Abstract] OR "exercise"[Title/Abstract] OR "exercises"[Title/Abstract] OR "running"[Title/Abstract] OR "walking"[Title/Abstract] OR "bicycling"[Title/Abstract] OR "gardening"[Title/Abstract] OR "sports"[Title/Abstract] OR "sport"[Title/Abstract] OR "activities of daily living"[Title/Abstract] OR "physical activity"[Title/Abstract] OR "physical activities"[Title/Abstract] OR "nonexercise activity"[Title/Abstract] OR "nonexercise activities"[Title/Abstract] OR "energy expenditure"[Title/Abstract] OR "caloric expenditure"[Title/Abstract]))

**3#** ("mortality" [Title/Abstract] OR "death" [Title/Abstract] OR "survival" [Title/Abstract] OR "life expectancy" [Title/Abstract] OR "years of life lost"[Title/Abstract]) OR "mortality"[MeSH Terms])

**1# AND 2# AND 3#**

**Scopus search example for the Chronic Obstructive Coronary Disease:**

**1#** (TITLE-ABS ( "human activit\*" OR "motor activit\*" OR "physical activit\*" OR "leisure activit\*" OR "exercise" OR "running" OR "walking" OR "bicycling" OR "gardening" OR "sport\*" OR "activit\* of daily living" OR "nonexercise activit\*" OR "energy expenditure" OR "caloric expenditure"))

**2#** (TITLE-ABS ( "mortality" OR "death" OR "survival" OR "life expectancy" OR "years of life lost"))

**3#** (TITLE-ABS ( "COPD" OR "chronic obstructive pulmonary disease" OR "COAD" OR "chronic obstructive airway disease" OR "chronic obstructive lung disease" OR "chronic airflow obstruction"))

**1# AND 2# AND 3#**

**Web of Science search example for the Chronic Obstructive Coronary Disease:**

**1#** "COPD" OR "chronic obstructive pulmonary disease" OR "COAD" OR "chronic obstructive airway disease" OR "chronic obstructive lung disease" OR "chronic airflow obstruction" **TOPIC**

**2#** "COPD" OR "chronic obstructive pulmonary disease" OR "COAD" OR "chronic obstructive airway disease" OR "chronic obstructive lung disease" OR "chronic airflow obstruction" **TITLE**

**3#** "human activit\*" OR "motor activit\*" OR "physical activit\*" OR "leisure activit\*" OR "exercise" OR "running" OR "walking" OR "bicycling" OR "gardening" OR "sport\*" OR "activit\* of daily living" OR "nonexercise activit\*" OR "energy expenditure" OR "caloric expenditure" **TOPIC**

**4#** "human activit\*" OR "motor activit\*" OR "physical activit\*" OR "leisure activit\*" OR "exercise" OR "running" OR "walking" OR "bicycling" OR "gardening" OR "sport\*" OR "activit\* of daily living" OR "nonexercise activit\*" OR "energy expenditure" OR "caloric expenditure" **TITLE**

**5#** "mortality" OR "death" OR "survival" OR "life expectancy" OR "years of life lost" **TOPIC**

**6#** "mortality" OR "death" OR "survival" OR "life expectancy" OR "years of life lost" **TITLE**

**1# OR 2# AND 3# OR 4# AND 5# OR 6#**
