# Supplementary material for: Dose–response relationship between physical activity and mortality in people with non-communicable diseases: a study protocol for the systematic review and meta-analysis of cohort studies
Source: PubMed Central journal article supplement — BMJ Open. 2019 Sep 11;9(9):e028653. doi: 10.1136/bmjopen-2018-028653 (PMC6747656; doi:10.1136/bmjopen-2018-028653), 2019-09-11
Supplement: bmjopen-2018-028653supp003.pdf [file bmjopen-2018-028653supp003.pdf]

## Data extraction form

### No. Data items

- 1 Study id
- 2 Result number
- 3 First author
- 4 Year
- 5 Country
- 6 Sex
- 7 Age
- 8 Study design
- 9 Name of study
- 10 Follow\_up
- 11 N\_participants
- 12 Diagnosis/Breast Cancer verification
- 13 Mortality\_data\_ascertainment
- 14 N\_cases
- 15 PA assessment
- 16 Domain of PA
- 17 Exposure
- 18 Case\_per\_cat
- 19 Noncases\_per\_cat
- 20 Exposure\_cat
- 21 Risk ratio
- 22 RR\_lower confidence interval
- 23 RR\_upper confidence interval
- 24 Exposure\_dose
- 25 RR dose
- 26 RR\_dose\_lower confidence interval
- 27 RR\_dose\_upper confidence interval
- 28 RR\_other model
- 29 Quality\_score
